# Supplementary material for: Roles of Epithelial and Mesenchymal TRP Channels in Mediating Inflammatory Fibrosis
Source: Frontiers journal article supplement (doi:10.3389/fimmu.2021.731674), 2022-01-04
Supplement: Table_1.pdf [file Table_1.pdf]

Table 1

|       | Induce Molekule | Depend on Phenotype                          |
|-------|-----------------|----------------------------------------------|
| TRPV1 | TGFβ1           | Resident tissue cells                        |
| TRPA1 | TGFβ1           | Resident tissue cells                        |
| TRPV4 | IL-6            | Resident tissue cells and inflammatory cells |
